# Supplementary material
Source: publisher figshare collection journal article supplement (https://adisjournals.figshare.com/articles/dataset/_/26947120)

# Dupilumab is Efficacious in Young Children with Atopic Dermatitis Regardless of Type 2 Comorbidities

Mark Boguniewicz • Lawrence D. Sher • Amy S. Paller • Peter D. Arkwright • Shigemi Yoshihara • Zhen Chen • Parul Shah • Ainara Rodríguez Marco

## OBJECTIVE

To evaluate the impact of **type 2 comorbidities** on the response to, and safety of **dupilumab** in young children with **atopic dermatitis**

**Asthma**  
**Allergic rhinitis**  
**Food allergies**

## METHODS

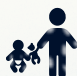

162 children aged 6 months to 5 years with moderate-to-severe atopic dermatitis with and without type 2 comorbidities

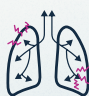

Asthma

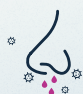

Allergic rhinitis

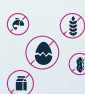

Food allergies

P

Placebo  
Every 4 Weeks (q4w) +  
Topical corticosteroids (TCS)  
**79 patients**

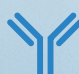

Dupilumab (200/300 mg)  
q4w + TCS  
**83 patients**

## RESULTS

Proportion of patients **with** and **without** comorbid asthma, allergic rhinitis or food allergies achieving an Investigator's Global Assessment (IGA) of 0 or 1 at Week 16

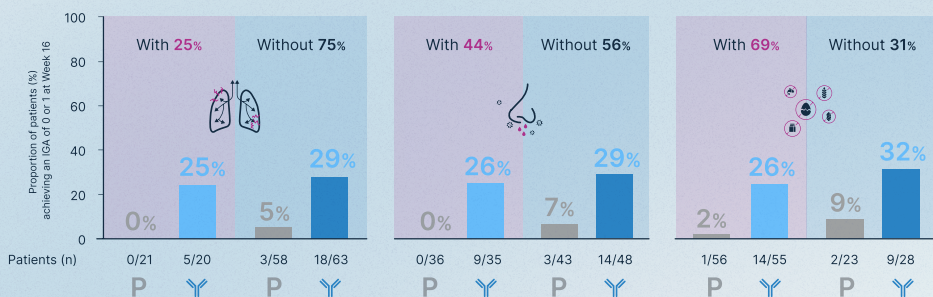

Similar results were observed for the proportion of patients achieving:

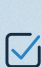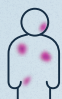

≥ 75% improvement in the Eczema Area and Severity Index (EASI-75)

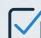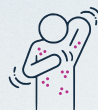

≥ 4-point reduction in the Worst Scratch/Itch Numeric Rating Scale (WSI-NRS)

## CONCLUSIONS

- ✓ **Dupilumab** improves signs and symptoms in **young children** with and without **type 2 comorbidities**
- Overall safety was consistent with the known **safety profile** of **dupilumab** in patients with and without **type 2 comorbidities**.

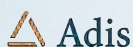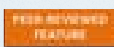

Supplement: Supplementary file 1 [file 2]
